# Supplementary material for: 2,2-Difluoro-1,3-dimethylimidazolidine (DFI). A new fluorinating agentElectronic supplementary information (ESI) available: experimental data. See http://www.rsc.org/suppdata/cc/b2/b204471d/
Source: Royal Society of Chemistry journal article supplement (doi:10.1039/b204471d), 2002-07-01
Supplement: b204471d.doc [file b204471d.doc]

# Supplementary information

Experimental data

Synthesis of 2,2-difluoro-1,3-dimethylimidazolidine(DFI)

To a 1000ml four necked reaction flask, 99.74g(0.590mol) of 2-chloro-1,3-dimethylimidazolinium chloride(CDC), 102.84g(1.770mol) of spray dried potassium fluoride, and 329.14g of 1,3-dimethyl-2-imidazolidinone(DMI) were charged, and reacted in a nitrogen atmosphere at 85℃ for 6 hours. After cooling the reaction mixture to 25℃, inorganic salts(KF, KCl) were separated from the reaction mixture, washed with 160g of DMI to obtain an DMI solution of DFI(MW 136.15). DFI concentration　in the solution was 15.1%. The yield of DFI is 93%.

The reaction mixture was vaccum distilled to obtain 71.0g of DFI having purity of 99.5%.

DFI had following properties.

Boiling point : 47.0℃/37mmHg

EIMS : 136(M+), 117(M+-F+)

IR(neat)cm-1 : 1486, 1385, 1295, 1242, 1085, 966, 711

F-analysis : Calculated 27.9%, Found 27.7%

1H-NMR(δ, ppm, CDCl3, TMS basis) : 2.52(s, 6H, -CH3×2), 3.05(s, 4H, -CH2CH2-)

13C-NMR(δ, ppm, CDCl3, -45℃, CDCl3 basis) : 31.4(s, -CH3×2), 47.6(s, -CH2CH2-), 128.5(t, J=230Hz, =CF2)

19F-NMR(δ, ppm, CDCl3, -45℃, CFCl3 basis) : -70.9(s, =CF2)

Synthesis of n-octyl fluoride(Table2, entry1)

DFI(0.205g, 1.50mmol) was added slowly to a solution of n-octyl alcohol(0.195g, 1.50mmol) in acetonitrile(4 ml) cooled to 0℃. The reaction mixture was then warmed to 25℃ and reacted at 25℃ for 1hr in a nitrogen atmosphere. After finishing the reaction, GC-MS measurement was carried out on the reaction mixture. Formation of n-octyl fluoride(master ion, 132) was confirmed. The yield was 87% by GC analysis.

Synthesis of 1,1-difluorocyclohexane and 1-fluorocyclohexene(Table2, entry5)

DFI(2.34g, 17.20mmol) was added slowly to a solution of cyclohexanone(0.843g, 8.60mmol) in 1,2-dimethoxyethane(8.5g) cooled to 0℃. The reaction mixture was then warmed to 85℃ and reacted at 85℃ for 6hrs in a nitrogen atmosphere. After finishing the reaction, formation of 1,1-difluorocyclohexane(master ion 120) and 1-fluorocyclohexene(master ion 100) was confirmed by GC-MS measurement was carried out on the reaction mixture. The yield of 1-fluorocyclohexene was 72%, 1,1-difluorocyclohexane was 21% by GC analysis.
